# Supplementary material
Source: PubMed Central journal article supplement (PMC5477626)
Supplement: 2016_163089-Disclosures_and_Contributions.pdf [file 2016_163089-Disclosures_and_Contributions.pdf]

Haematologica  
HAEMATOL/2016/163089  
Version 2

Changes in allele frequencies of CSF3R and SETBP1 mutations and  
evidence of clonal evolution in a chronic neutrophilic leukemia patient  
treated with ruxolitinib

Zohra Nooruddin, Nicholas Miltgen, Qi Wei, Jeffrey Schowinsky,  
Zengang Pan, Jennifer Tobin, Enkhtsetseg Purev, Jonathan A.  
Gutman, William Robinson, and Daniel A. Pollyea

Disclosures: None

Contributions: ZH, JT, EP, JAG, WR and DAP prepared the manuscript NM and QW  
performed the sequencing JS and ZP prepared the figures
